# Supplementary material for: VUV-UV-vis photoluminescence, X-ray radioluminescence and energy transfer dynamics of Ce3+ and Eu2+ in Sr2MgSi2O7
Source: Royal Society of Chemistry journal article supplement (doi:10.1039/d2dt03165e), 2022-01-01
Supplement: d2dt03165e1.pdf [file d2dt03165e1.pdf]

Electronic Supplementary Information for:

**VUV-UV-vis photoluminescence, X-ray radioluminescence and energy transfer dynamics of Ce<sup>3+</sup> and Eu<sup>2+</sup> in Sr<sub>2</sub>MgSi<sub>2</sub>O<sub>7</sub>**

Donghao Wen <sup>a</sup>, Quanfeng Li <sup>a</sup>, Yiyi Ou <sup>a</sup>, Yunlin Yang <sup>a</sup>, Zeming Qi <sup>b</sup>, Pieter Dorenbos <sup>c</sup>, Hongbin Liang <sup>\*a</sup>

<sup>a</sup> *MOE Key Laboratory of Bioinorganic and Synthetic Chemistry, KLGHEI of Environment and Energy Chemistry, School of Chemistry, Sun Yat-sen University, Guangzhou 510006, China*

<sup>b</sup> *National Synchrotron Radiation Laboratory, University of Science and Technology of China, Hefei 230029, China*

<sup>c</sup> *Faculty of Applied Sciences, Delft University of Technology, 2629 JB, Delft, The Netherlands*

\* E-mail: [cesbin@sysu.edu.cn](mailto:cesbin@sysu.edu.cn) (Hongbin Liang).

## Contents

**Fig. S1** (a) The Rietveld refinement of laboratory high quality XRD data of the  $\text{Sr}_2\text{MgSi}_2\text{O}_7$  sample at RT. (b) The coordination environments of a  $\text{Sr}^{2+}$  site and the  $\text{Sr}^{2+}\text{-O}^{2-}$  bond lengths (Å). (c) The crystal structure of  $\text{Sr}_2\text{MgSi}_2\text{O}_7$ . (d) The XRD patterns of  $\text{Sr}_{2-2x}\text{Ce}_x\text{Na}_x\text{MgSi}_2\text{O}_7$  ( $x = 0.001, 0.03$ ),  $\text{Sr}_{2-x}\text{Eu}_x\text{MgSi}_2\text{O}_7$  ( $x = 0.001$ ) and  $\text{Sr}_{1.99-x}\text{Ce}_{0.005}\text{Eu}_x\text{Na}_{0.005}\text{MgSi}_2\text{O}_7$  ( $x = 0.01$ ) samples at RT.

**Fig. S2** The height normalized excitation ( $\lambda_{\text{em}} = 350, 368, 373, 382$  nm) and emission ( $\lambda_{\text{ex}} = 267, 272, 277, 319, 326, 332$  nm) spectra of the sample  $\text{Sr}_{1.998}\text{Ce}_{0.001}\text{Na}_{0.001}\text{MgSi}_2\text{O}_7$  at RT.

**Fig. S3** The synchrotron radiation far infrared reflectance spectrum of  $\text{Sr}_2\text{MgSi}_2\text{O}_7$  at RT.

**Fig. S4** (a) The height normalized excitation ( $\lambda_{\text{em}} = 370$  nm) and emission ( $\lambda_{\text{ex}} = 273$  nm) spectra and (b) luminescence decay curves ( $\lambda_{\text{ex}} = 313$  nm,  $\lambda_{\text{em}} = 370$  nm) of the samples  $\text{Sr}_{2-2x}\text{Ce}_x\text{Na}_x\text{MgSi}_2\text{O}_7$  ( $x = 0.001, 0.005, 0.03$ ) at RT.

**Fig. S5** The VUV-UV excitation (a,  $\lambda_{\text{em}} = 616$  nm, 10 K) and UV-vis excitation (b,  $\lambda_{\text{em}} = 613$  nm, RT) spectra of  $\text{Sr}_{1.998}\text{Eu}_{0.001}\text{Na}_{0.001}\text{MgSi}_2\text{O}_7$ .

**Fig. S6** The  $\lambda^3\text{-}\tau$  relationship of  $\text{Ce}^{3+}$  in  $\text{Sr}_2\text{MgSi}_2\text{O}_7$ ,  $\text{Ba}_2\text{MgSi}_2\text{O}_7$  and  $\text{BaMg}_2\text{Si}_2\text{O}_7$ .

**Table S1** Thermal quenching activation energy ( $E_a$ ), reciprocal of intrinsic lifetime ( $\Gamma_v$ ), thermal-quenching rate at  $T = \infty$  ( $\Gamma_0$ ) and coefficients of determination of fitting procedure ( $R^2$ ) via equations (6) and (7).

**Table S2** The  $S$  value, energy transfer microparameters ( $C_{\text{DA}}$ ), energy migration microparameters ( $C_{\text{DD}}$ ) and coefficients of determination of fitting procedure ( $R^2$ ) via Inokuti-Hirayama (IH), Yokota-Tanimoto (YT) and Burshtein model.

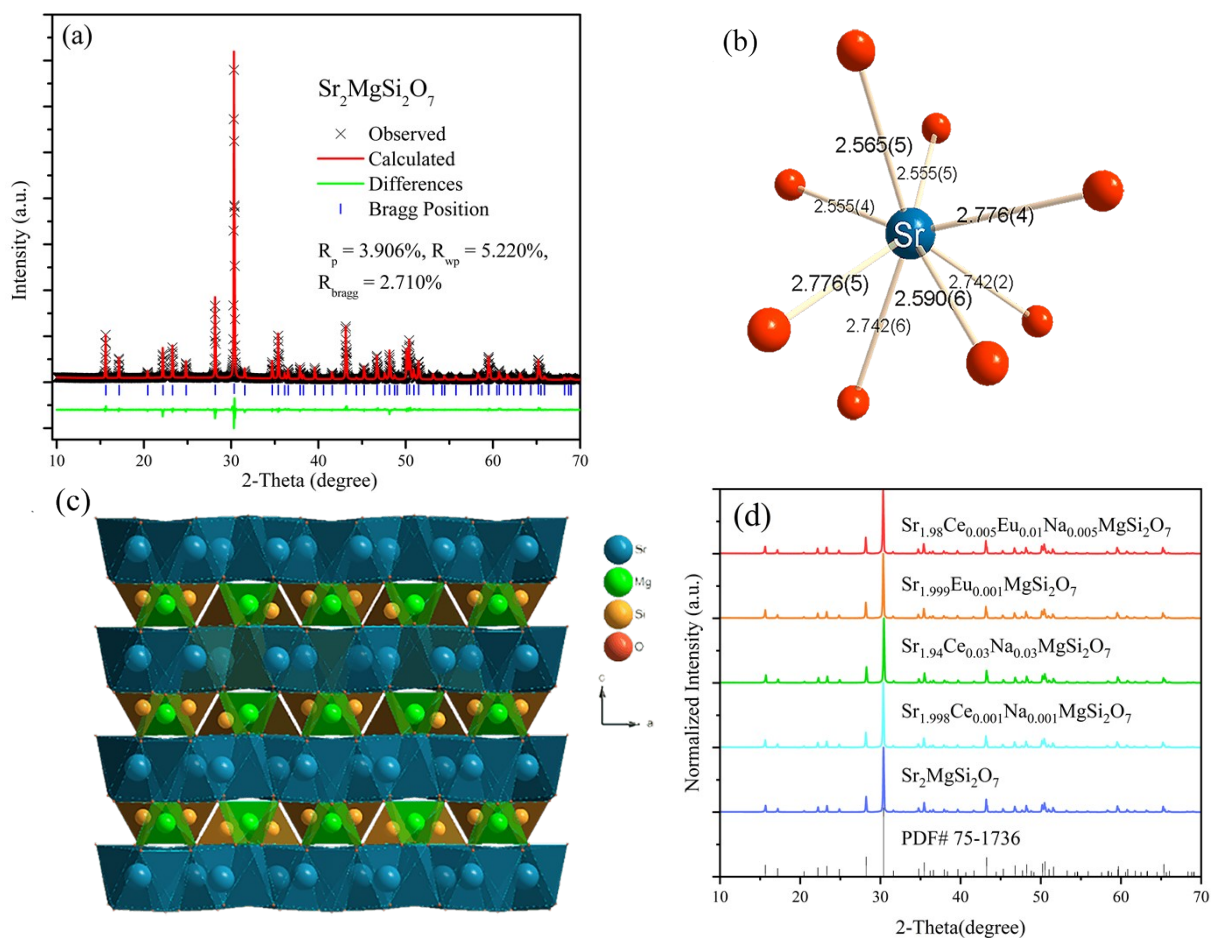

**Fig. S1** (a) The Rietveld refinement of laboratory high quality XRD data of the  $\text{Sr}_2\text{MgSi}_2\text{O}_7$  sample at RT. (b) The coordination environments of a  $\text{Sr}^{2+}$  site and the  $\text{Sr}^{2+}\text{-O}^{2-}$  bond lengths ( $\text{\AA}$ ). (c) The crystal structure of  $\text{Sr}_2\text{MgSi}_2\text{O}_7$ . (d) The XRD patterns of  $\text{Sr}_{2-2x}\text{Ce}_x\text{Na}_x\text{MgSi}_2\text{O}_7$  ( $x = 0.001, 0.03$ ),  $\text{Sr}_{2-x}\text{Eu}_x\text{MgSi}_2\text{O}_7$  ( $x = 0.001$ ) and  $\text{Sr}_{1.99-x}\text{Ce}_{0.005}\text{Eu}_x\text{Na}_{0.005}\text{MgSi}_2\text{O}_7$  ( $x = 0.01$ ) samples at RT.

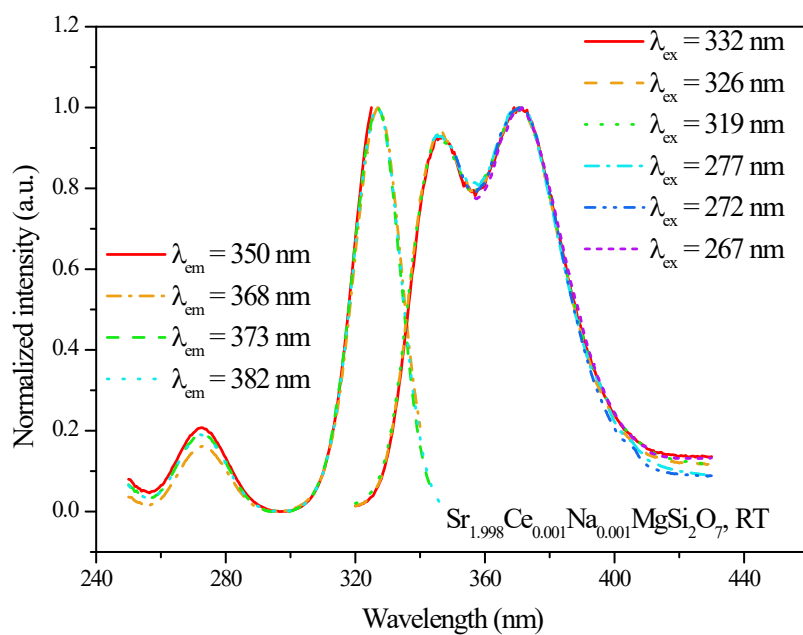

**Fig. S2** The height normalized excitation ( $\lambda_{\text{em}} = 350, 368, 373, 382$  nm) and emission ( $\lambda_{\text{ex}} = 267, 272, 277, 319, 326, 332$  nm) spectra of the sample  $\text{Sr}_{1.998}\text{Ce}_{0.001}\text{Na}_{0.001}\text{MgSi}_2\text{O}_7$  at RT.

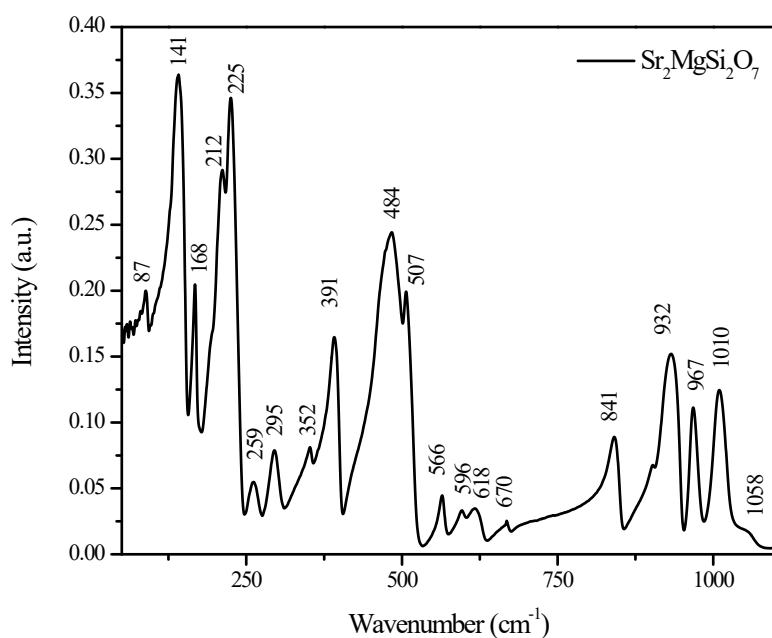

**Fig. S3** The synchrotron radiation far infrared reflectance spectrum of  $\text{Sr}_2\text{MgSi}_2\text{O}_7$  at RT.

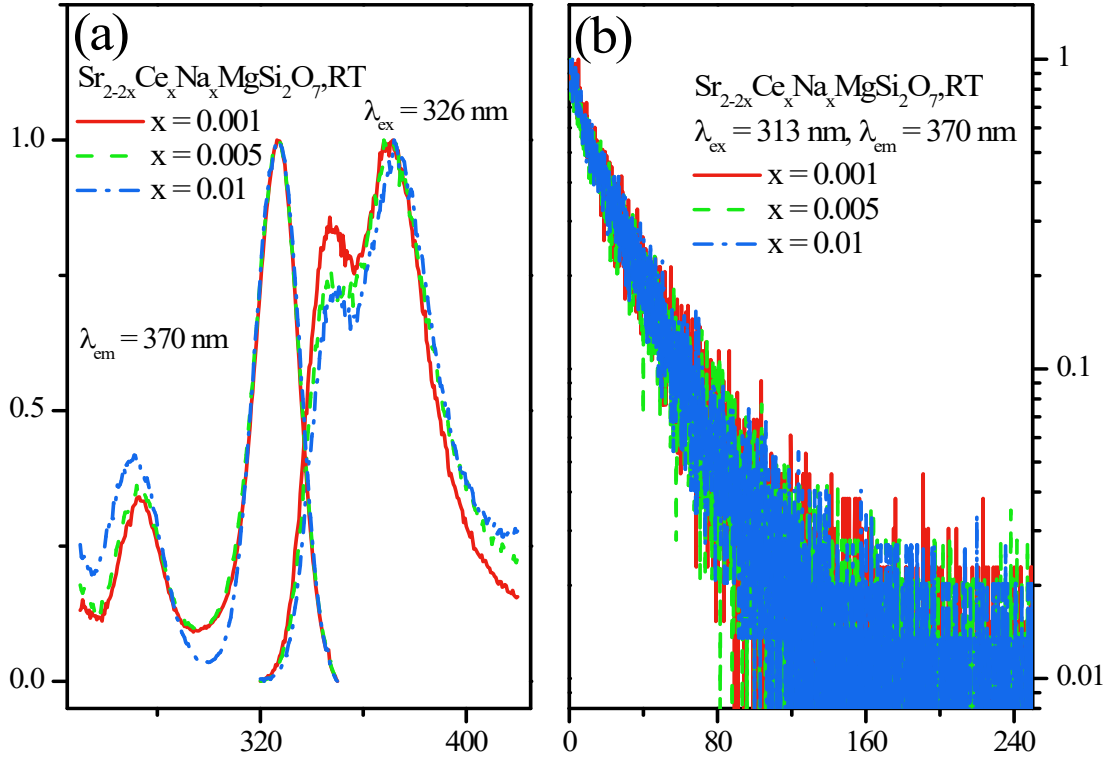

**Fig. S4** (a) The height normalized excitation ( $\lambda_{em} = 370$  nm) and emission ( $\lambda_{ex} = 273$  nm) spectra and (b) luminescence decay curves ( $\lambda_{ex} = 313$  nm,  $\lambda_{em} = 370$  nm) of the samples  $Sr_{2-2x}Ce_xNa_xMgSi_2O_7$  ( $x = 0.001, 0.005, 0.03$ ) at RT.

The  $Ce^{3+}$  doping concentration dependent luminescence is studied. The height normalized excitation ( $\lambda_{em} = 370$  nm) and emission ( $\lambda_{ex} = 273$  nm) spectra of the samples  $Sr_{2-2x}Ce_xNa_xMgSi_2O_7$  ( $x = 0.001, 0.005, 0.03$ ) at RT are shown in Fig. S4(a) for comparison. The change of doping concentration of  $Ce^{3+}$  almost makes no difference to the excitation peak at  $\sim 326$  nm, implying that the lowest 5d state energy is quite stable for different doping concentrations. The emission peak position of  $5d-^2F_{5/2}$  remains unchanged at  $\sim 345$  nm but the emission intensity ratio of  $5d-^2F_{7/2}$  to  $5d-^2F_{5/2}$  increases with the increasing concentrations due to the reabsorption.

The luminescence decay curves of the samples  $Sr_{2-2x}Ce_xNa_xMgSi_2O_7$  ( $x = 0.001, 0.005, 0.03$ ) at RT are shown in Fig. S4(b). All decay curves overlap with each other and follow exponential characteristic, and the lifetime is estimated to be

27.2 ns, implying that concentration quenching does not occur in the studied concentration range. The lifetime at RT in Fig. S4(b) is consistent with that at 78K in the inset of Fig. 1, implying that temperature quenching does not occur below RT.

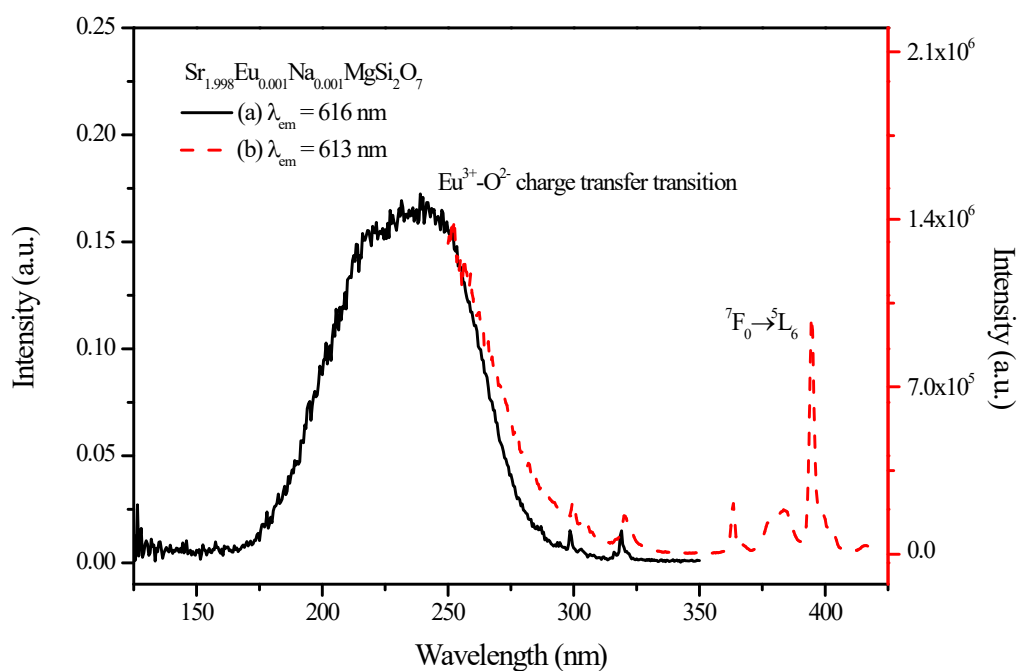

**Fig. S5** The VUV-UV excitation (a,  $\lambda_{\text{cm}} = 616$  nm, 10 K) and UV-vis excitation (b,  $\lambda_{\text{cm}} = 613$  nm, RT) spectra of  $\text{Sr}_{1.998}\text{Eu}_{0.001}\text{Na}_{0.001}\text{MgSi}_2\text{O}_7$ .

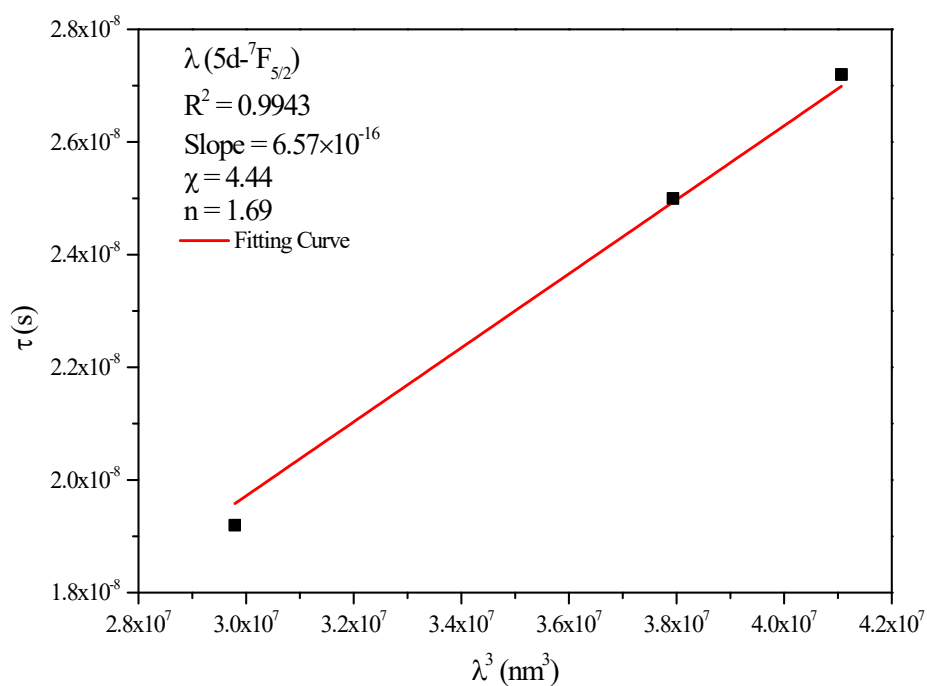

**Fig. S6** The  $\lambda^3$ - $\tau$  relationship of  $\text{Ce}^{3+}$  in  $\text{Sr}_2\text{MgSi}_2\text{O}_7$ ,  $\text{Ba}_2\text{MgSi}_2\text{O}_7$  and  $\text{BaMg}_2\text{Si}_2\text{O}_7$ .

**Table S1** Thermal quenching activation energy ( $E_a$ ), reciprocal of intrinsic lifetime ( $\Gamma_v$ ), thermal-quenching rate at  $T = \infty$  ( $\Gamma_0$ ) and coefficients of determination of fitting procedure ( $R^2$ ) via equations (6) and (7).

| $\text{Eu}^{2+}$     | $E_a$ (eV) | $\Gamma_v$ ( $\text{s}^{-1}$ ) | $\Gamma_0$ ( $\text{s}^{-1}$ ) | $R^2$ |
|----------------------|------------|--------------------------------|--------------------------------|-------|
| Integrated intensity | 0.226      | $1.73 \times 10^6$             | $1.84 \times 10^{10}$          | 0.989 |
| Lifetime             | 0.252      | $1.76 \times 10^6$             | $4.83 \times 10^{10}$          | 0.999 |

**Table S2** The  $S$  value, energy transfer microparameters ( $C_{DA}$ ), energy migration microparameters ( $C_{DD}$ ) and coefficients of determination of fitting procedure ( $R^2$ ) via Inokuti-Hirayama (IH), Yokota-Tanimoto (YT) and Burshtein model.

| Model     | $S$ | $C_{DA}$ ( $m^6 \cdot s^{-1}$ ) | $C_{DD}$ ( $m^6 \cdot s^{-1}$ ) | $R^2$ |
|-----------|-----|---------------------------------|---------------------------------|-------|
| IH        | 6   | $2.89 \times 10^{-45}$          | -                               | 0.998 |
| IH        | 8   | $1.82 \times 10^{-62}$          | -                               | 0.997 |
| IH        | 10  | $7.98 \times 10^{-80}$          | -                               | 0.996 |
| YT        | 6   | $2.35 \times 10^{-46}$          | $1.03 \times 10^{-45}$          | 0.992 |
| Burshtein | 6   | $1.16 \times 10^{-46}$          | $9.02 \times 10^{-45}$          | 0.997 |
